# Supplementary material for: Improving the dissolution of fenofibrate with yeast cell-derived hollow core/shell carbon microparticles
Source: Royal Society of Chemistry journal article supplement (doi:10.1039/c6ra00308g), 2016-01-01
Supplement: c6ra00308g1.pdf [file c6ra00308g1.pdf]

*Electronic Supplementary Information (ESI) for:*

## **Improving dissolution of fenofibrate with yeast cells-derived hollow core/shell carbon microparticles**

**Xiaoxi Huang,<sup>a</sup> Tao Zhang,<sup>b</sup> Xiaoxin Zou,<sup>c</sup> Zhimin Tao<sup>\*a</sup> and Tewodros Asefa<sup>\* a,b,d</sup>**

<sup>a</sup> Department of Chemistry and Chemical Biology, Rutgers, The State University of New Jersey, Piscataway, New Jersey, 08854, United States

<sup>b</sup> Department of Chemical and Biochemical Engineering, Rutgers, The State University of New Jersey, Piscataway, New Jersey, 08854, United States

<sup>c</sup> State Key Laboratory of Inorganic Synthesis and Preparative Chemistry, International Joint Research Laboratory of Nano-Micro Architecture Chemistry, College of Chemistry, Jilin University, Changchun 130012, China

<sup>d</sup> Institute for Advanced Materials, Devices and Nanotechnology (IAMDN), Rutgers, The State University of New Jersey, Piscataway, New Jersey 08854, United States

\* Corresponding Authors: (T.A.) [tasefa@rci.rutgers.edu](mailto:tasefa@rci.rutgers.edu); (Z.T.) [tzmsyr@yahoo.com](mailto:tzmsyr@yahoo.com)

**Table S1.** Elemental composition of HCSC600 obtained from XPS data.

| Elements | C     | N    | O    | Si   | Fe   | P    |
|----------|-------|------|------|------|------|------|
| Atomic % | 85.44 | 2.77 | 9.15 | 2.26 | 0.13 | 0.25 |

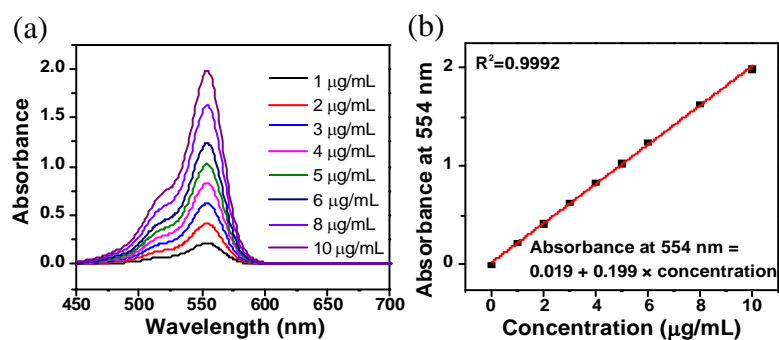

**Fig. S1** (a) UV-Vis absorption spectra of different concentrations of rhodamine B (RhB) in aqueous solutions. (b) Calibration curve of RhB in aqueous solutions using its absorbance at 554 nm.

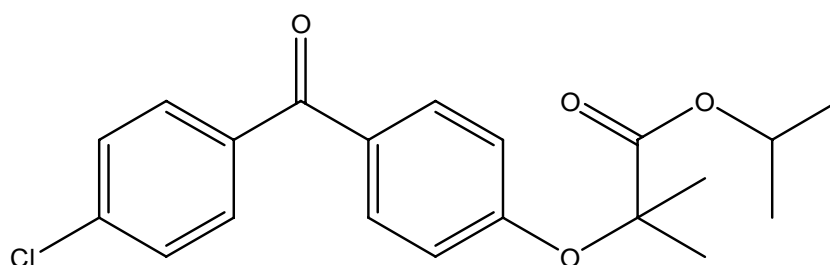

**Fig. S2** Molecular structure of fenofibrate (FFB).

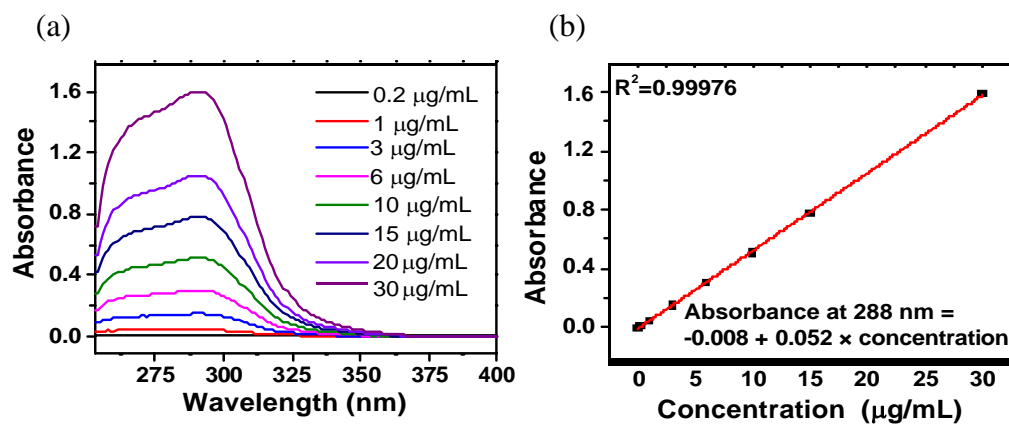

**Fig. S3** (a) UV-vis spectra of different concentrations of FFB in PBS solution containing 0.3% SDS. (b) Calibration curve of FFB in aqueous solutions using its absorbance at 288 nm.

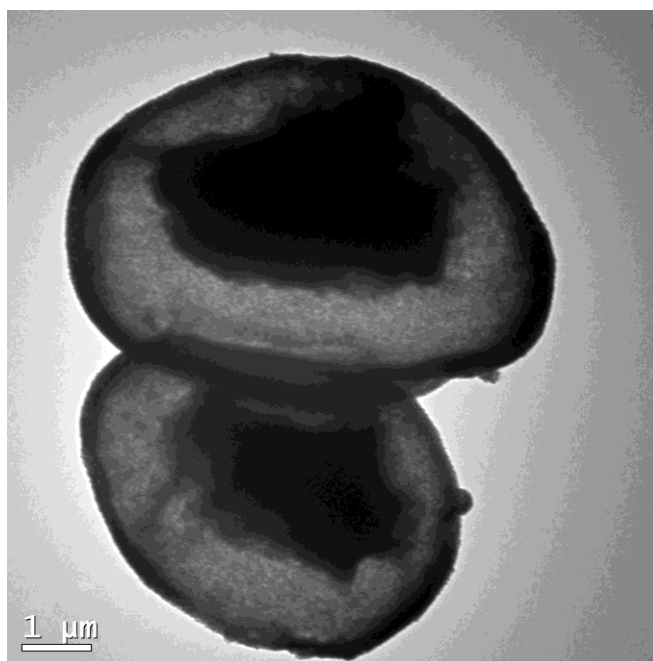

**Fig. S4** TEM image of the HCSC600 after the FFB release experiment.

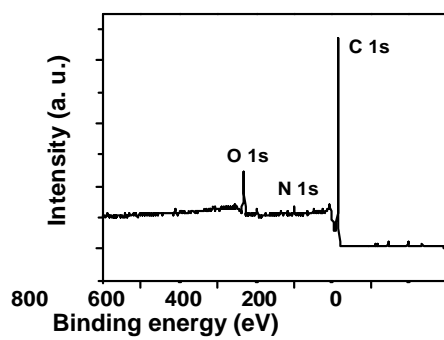

**Fig. S5** XPS survey spectra of HCSC600.
